# Supplementary material for: Yeast powder derived carbon quantum dots for dopamine detection and living cell imaging
Source: Royal Society of Chemistry journal article supplement (doi:10.1039/d2ay00231k), 2022-01-01
Supplement: d2ay00231k1.pdf [file d2ay00231k1.pdf]

## **Electronic Supplementary Information**

### **Yeast powder derived carbon quantum dots for dopamine detection and living cell imaging**

Xue Cao<sup>a</sup>, Congying Shao<sup>a\*</sup>, Cheng Zhang<sup>a</sup>, Mengna Liang<sup>a</sup>, Yongxiang Wang<sup>a</sup>, Jun Cheng<sup>c</sup>, Shun Lu<sup>b\*\*</sup>

<sup>a</sup> College of Chemistry and Materials Science/Key Laboratory of Green and Precise Synthetic Chemistry, Ministry of Education, Huaibei Normal University, Huaibei, Anhui 235000, China

<sup>b</sup> Chongqing Institute of Green and Intelligent Technology, Chinese Academy of Sciences, Chongqing, 400714, China

<sup>c</sup> School of Mechatronics & Vehicle Engineering, Chongqing Jiaotong University, Chongqing 400074, China

Corresponding authors: [shaocongying@163.com](mailto:shaocongying@163.com) (CY. Shao) and [ysfield@live.com](mailto:ysfield@live.com) (S. Lu)

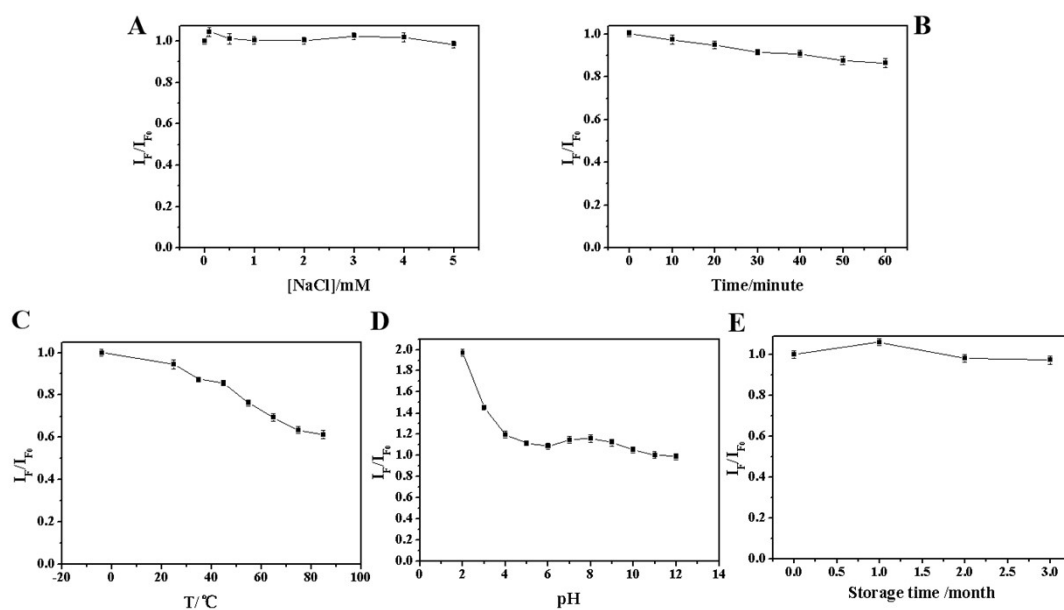

**Fig. S1** The stability of as-synthesized Y-CDs. (A) Salt-tolerance of Y-CDs exposed to NaCl solutions with various concentrations. (B) Fluorescence intensity of the Y-CDs under the 365 nm light illumination. (C) Fluorescence intensity of Y-CDs incubated at different temperatures. (D) Fluorescent intensity of Y-CDs in Britton-Robinson (BR) buffer solutions with various pH values. (E) Fluorescence intensity of Y-CDs at different storage time.

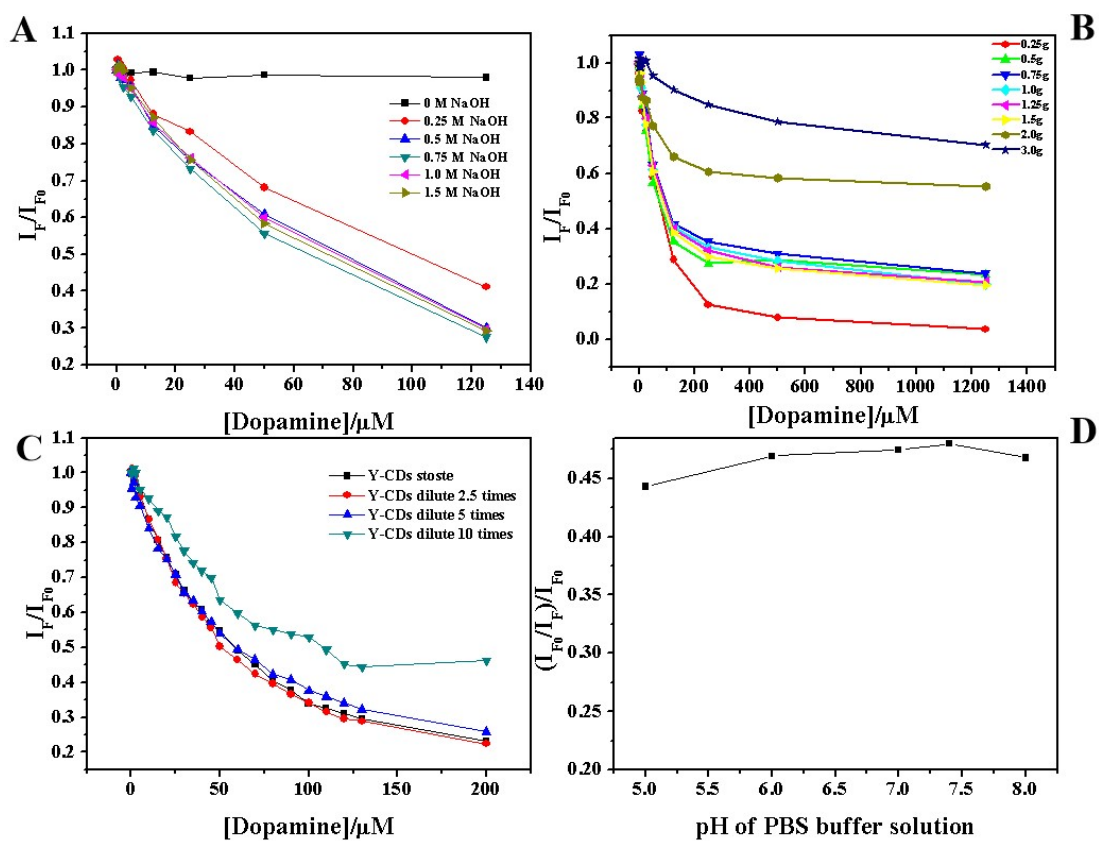

**Fig. S2** Optimization of detection conditions. (A) Effect of NaOH concentration. (B) Effect of the mass of yeast powder. (C) Effect of probe content. (D) Effect of solution pH values.

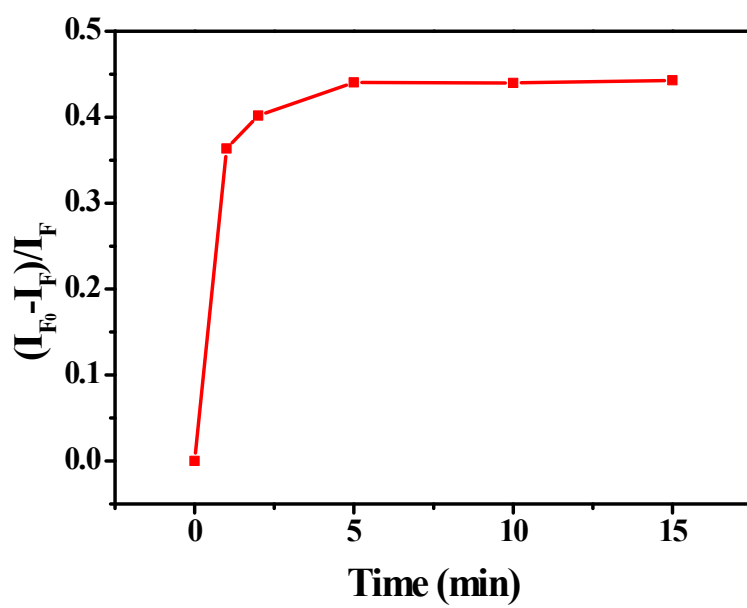

**Fig. S3** Effect of incubation time of Y-CDs probe and DA with the concentration of 50  $\mu$ M.

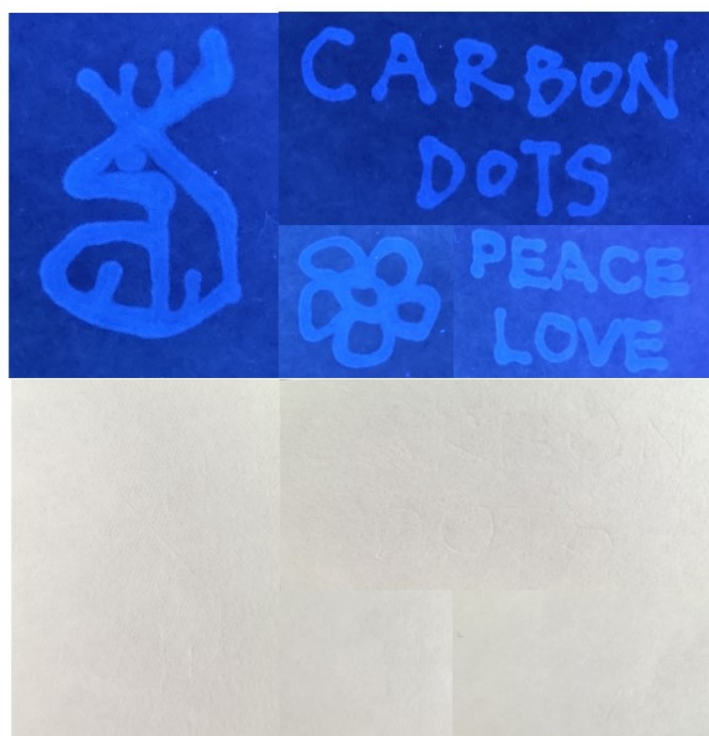

**Fig. S4** Photographs of the fluorescent patterns hand-drawn by Y-CDs as the fluorescent inks under UV light (up) and daylight (down). The bright blue fluorescent patterns were observed in filter paper under UV light excitation, while the patterned filter paper seemed no apparent change under daylight, indicating its great application potential in anti-counterfeiting, information encryption and storage.

**Table S1** Comparison of different methods for DA detection.

| Type of probe               | Detection range         | LOD                  | Ref       |
|-----------------------------|-------------------------|----------------------|-----------|
| CdTe QDs@CQDs               | 10-220 $\mu\text{M}$    | 0.36 $\mu\text{M}$   | 1         |
| CDs                         | 2.0-40.0 $\mu\text{M}$  | 0.52 $\mu\text{M}$   | 2         |
| ZnO@Cys                     | 26.3-68.5 $\mu\text{M}$ | 0.791 $\mu\text{M}$  | 3         |
| CQDs                        | 20-100 mM               | 0.2 mM               | 4         |
| r-QDs@SiO <sub>2</sub> -PDA | 10-80 $\mu\text{M}$     | 0.12 $\mu\text{M}$   | 5         |
| N-CQDs                      | 0.25-100 $\mu\text{M}$  | 0.0972 $\mu\text{M}$ | 6         |
| GQDs                        | 0.01-3 $\mu\text{M}$    | 0.0033 $\mu\text{M}$ | 7         |
| S,N-CQDs                    | 0-50 $\mu\text{M}$      | 0.082 $\mu\text{M}$  | 8         |
| Y-CDs                       | 0.05-100 $\mu\text{M}$  | 0.03 $\mu\text{M}$   | This work |

## References

- [1] Xu Y Q, Wei X, Li H J, Zheng X D, Lu K, Liu X Q, Wang K and Yan Y S 2016 Boric acid functionalized ratiometric fluorescence probe for sensitive and on-site naked eye determination of dopamine based on two different kinds of quantum dots RSC Adv. 6 72715-72721
- [2] Wei M X, Wei N, Pang L F, Guo X F and Wang H 2021 Determination of

- dopamine in human serum based on green-emitting fluorescence carbon dots  
Optical Materials 118 111257
- [3] Lin J, Huang B, Dai Y F, Wei J C and Chen Y W 2018 Chiral ZnO nanoparticles for detection of dopamine Materials Science & Engineering: C 93 739-45
- [4] Bharathi D, Siddlingeshwar B, Krishna R H, Singh V, Kottam N, Divakar D D and Alkheraif A A 2018 Green and cost effective synthesis of fluorescent carbon quantum dots for dopamine detection J. Fluoresc. 28 1-7
- [5] Yu M, Lu Y and Tan Z J 2017 Fluorescence growth of self-polymerized fluorescence polydopamine for ratiometric visual detection of DA Talanta 168 16-22
- [6] Wang C J, Shi H X, Yang M, Yan Y J, Liu E Z, Ji Z and Fan J 2020 A novel nitrogen-doped carbon quantum dots as effective fluorescent probes for detecting dopamine J. Photoch. Photobio. A 391 112374
- [7] Ma Y, Chen A Y, Xie X F, Wang X Y, Wang D, Wang P, Li H J, Yang J H and Li Y 2019 Doping effect and fluorescence quenching mechanism of N-doped graphene quantum dots in the detection of dopamine Talanta 196 563-571
- [8] Wang C J, Shi H X, Yang M, Yao Z R, Zhang B, Liu E Z, Hu X Y, Xue W M and Fan J 2021 Biocompatible sulfur nitrogen co-doped carbon quantum dots for highly sensitive and selective detection of dopamine Colloid. Surface. B 205 111874
